# Supplementary material for: Distinct gene expression patterns correlate with developmental and functional traits of iNKT subsets
Source: PubMed Central journal article supplement (PMC5062562; doi:10.1038/ncomms13116), 2016-10-10
Supplement: ncomms13116-s1.pdf [file ncomms13116-s1.pdf]

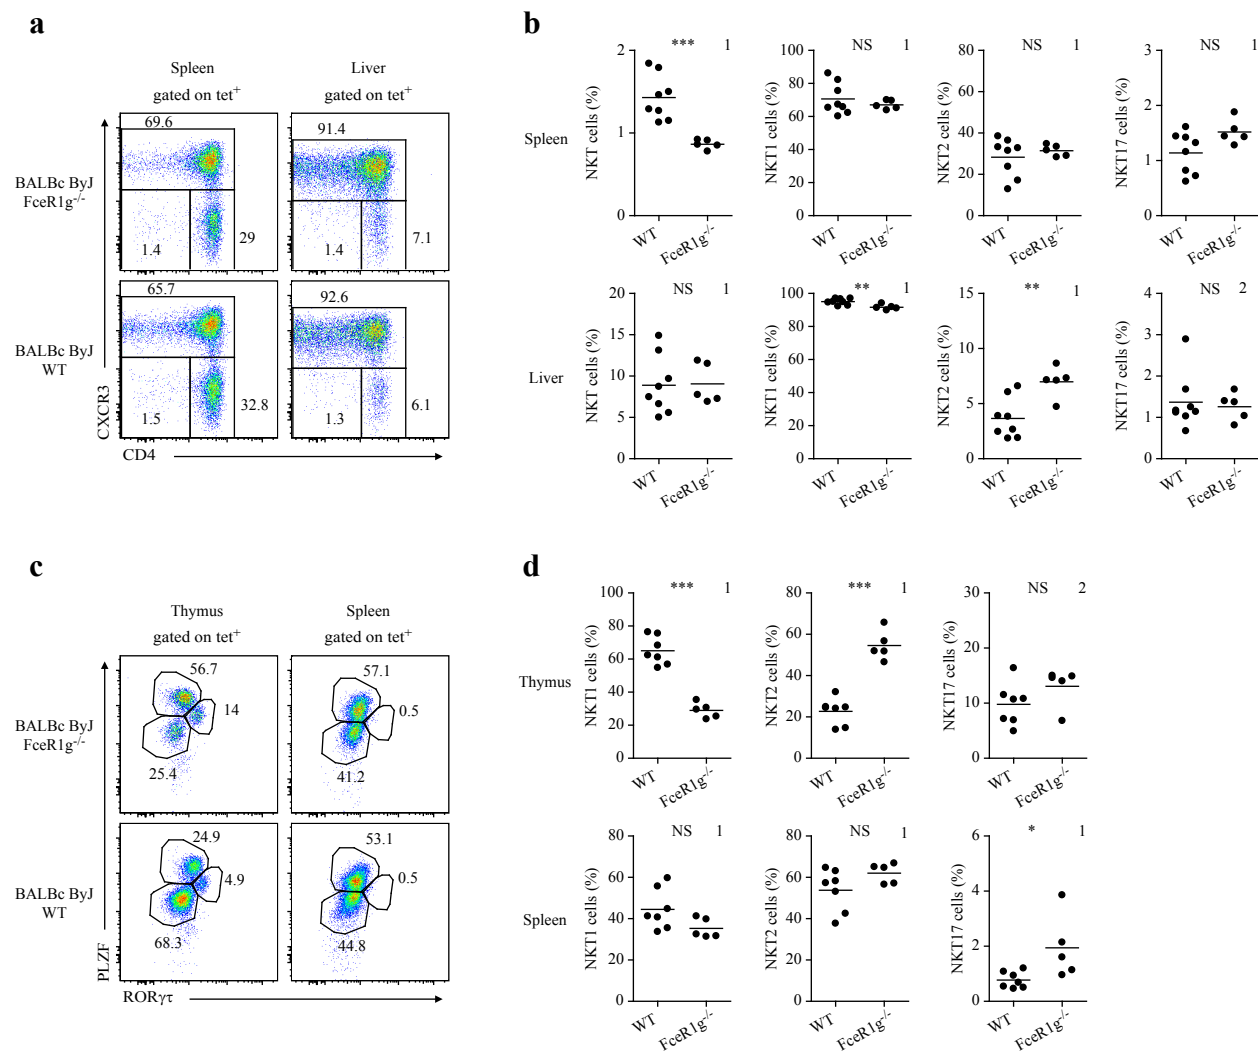

### Supplementary Figure 1. Analysis of *Fcer1g*<sup>-/-</sup> mice.

(a) iNKT cells (DAPI-B220-tet<sup>+</sup>) isolated from spleen and liver of WT and *Fcer1g*<sup>-/-</sup> mice were gated according to their expression of CXCR3 and CD4. Numbers given indicate the percentage of cells in each gate. (b) Summary of data obtained from iNKT subset analyses as indicated in (a). (c) iNKT cells (DAPI-B220-tet<sup>+</sup>) from thymus and spleen were analyzed based on their expression of PLZF and ROR $\gamma$ t. (d) Summary of data obtained from iNKT subset analyses as indicated in (c). The data shown in (a, c) are representative of at least 5 individually stained samples each, spleen and liver or thymus and spleen, respectively. Data shown in the right panels of (b, d) were collected from 2 independent experiments (WT: n=8; ko: n=5). Each dot represents one animal. The statistical tests performed are indicated by a small number in the upper right corner. 1: Unpaired two-tailed t-test, 2: Unpaired two-tailed Mann-Whitney test. NS, not significant ( $P > 0.05$ ), \* $P < 0.05$ , \*\* $P < 0.01$  and \*\*\* $P < 0.001$ .

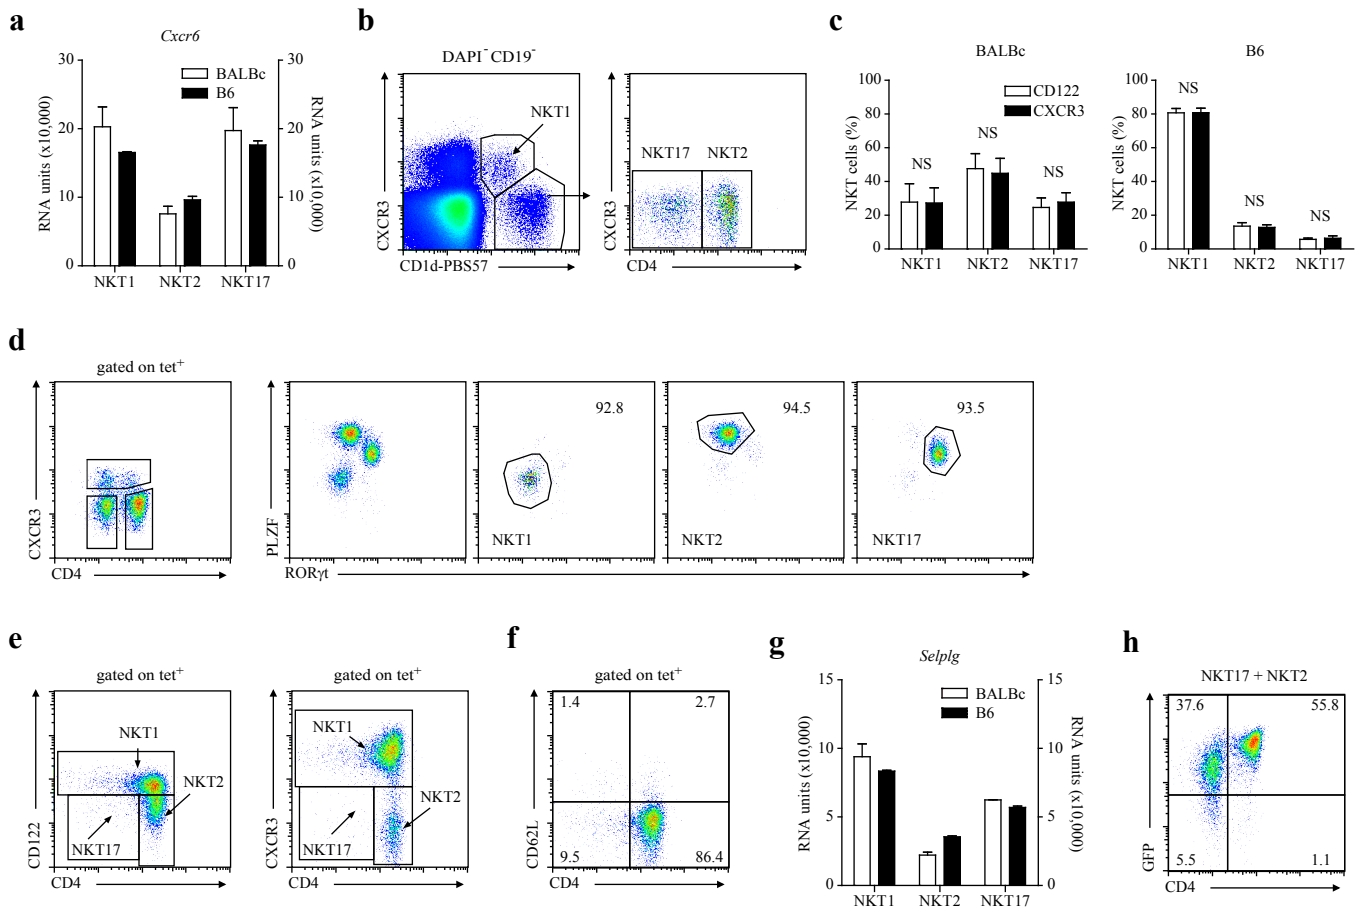

### Supplementary Figure 2. CXCR3 as a marker to define iNKT1 cells

(a, g) Expression of the indicated genes in iNKT subsets depicted as in Fig. 1e, f. (b) Gating strategy for DAPI-CD19<sup>-</sup> thymocytes as depicted in Fig. 1b but replacing CD122 by CXCR3. (c) Antibody staining of thymocytes using either expression of CXCR3 (black bar) or CD122 (open bar) for determining iNKT subset composition as shown in (b). Cell suspensions were analyzed in split samples of each thymus using either anti CXCR3 antibody or anti CD122 antibody. Shown are means  $\pm$  SD (n=6-7) (d) iNKT1, 2 and 17 populations were gated according to expression of CD4 and CXCR3 and their purity determined by staining for PLZF and ROR $\gamma$ t. (e) tet<sup>+</sup>CD19-DAPI- iNKT cells of BALB/c spleen can be subtyped into iNKT1, 2 and 17 cells more conveniently when using CXCR3 as marker (right panel) instead of CD122 (left panel). (f) Expression of CD62L on splenic iNKT17 and iNKT2 cells (tet<sup>+</sup>DAPI-B220-CD122<sup>lo</sup>). (h) Expression of GFP in iNKT17 and iNKT2 cells of thymus of 4get mice. Cell gating as in (f). Data are representative of at least 3 (b, c, d, e) independent experiments. An unpaired two-tailed t-test was performed in (c). NS, not significant ( $P > 0.05$ ).

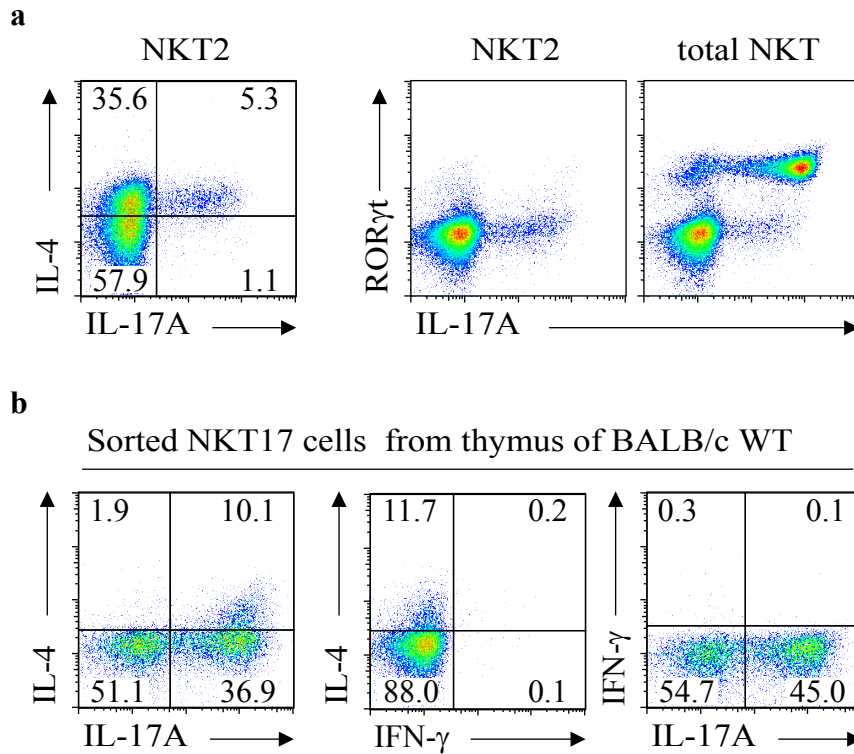

**Supplementary Figure 3. iNKT subtype specific expression characteristics.**

(a) All iNKT cells or iNKT2 cells were sorted from thymus of BALB/c mice and stimulated with PMA/ionomycin followed by simultaneous intracellular detection of IL-4 and IL-17 (iNKT2 cells, left panel) as described in Methods. In parallel samples, expression of IL-17 and ROR $\gamma$ t was monitored in either iNKT2 cells or the pool of total iNKT cells (two panels to the right). (b) iNKT17 cells were sorted from BALB/c thymus and seeded onto 96well plates coated with anti CD3 and anti CD28 antibody (Methods). Production of cytokines was recorded by intracellular staining 6h later. Data shown are representative for at least two independently sorted cell populations each.

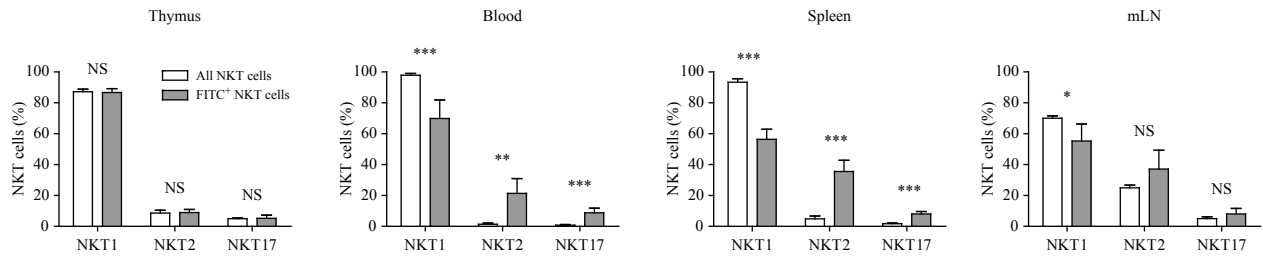

#### Supplementary Figure 4. Analysis of iNKT RTE of B6.

Mice were injected with FITC intra-thymically and the RTE (DAPI-B220-tet<sup>+</sup>) analyzed 40h later. Shown is the iNKT subtype composition in all iNKT cells (open bars) in the compartment indicated or only that of iNKT RTE (FITC<sup>+</sup>, grey bars). Shown are means  $\pm$  SD (n=5), data pooled from 2 independent experiments. An unpaired two-tailed t-test was performed. NS, not significant ( $P > 0.05$ ), \* $P < 0.05$ , \*\* $P < 0.01$  and \*\*\* $P < 0.001$ .

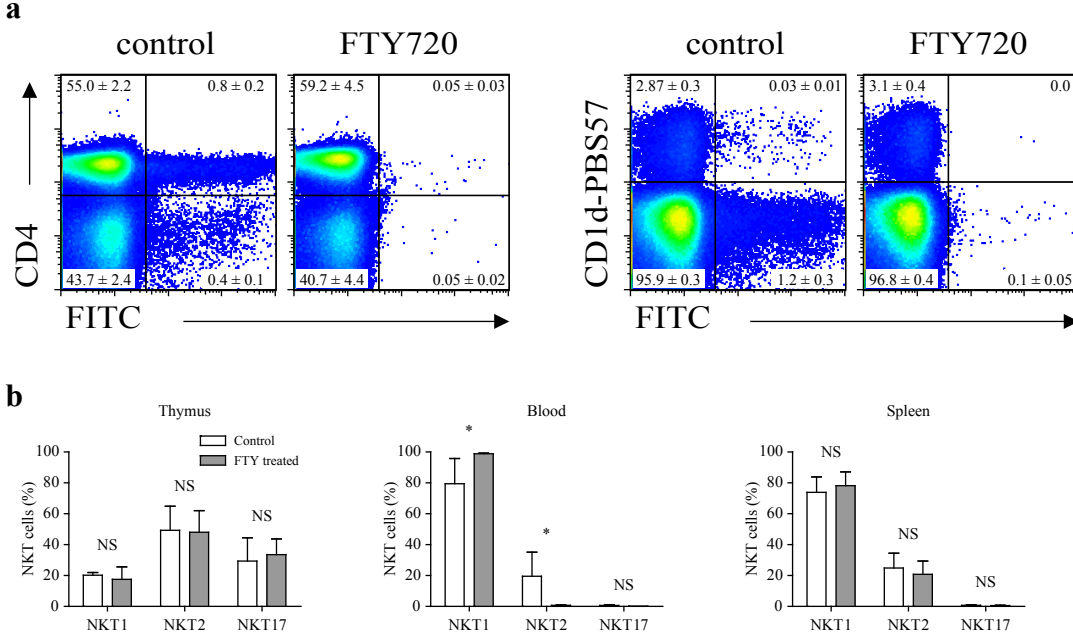

**Supplementary Figure 5. Effects of FTY720 treatment on iNKT subset composition.**

**(a)** Frequencies of RTE (FITC<sup>+</sup>) are drastically reduced among spleen cells (DAPI-B220<sup>-</sup>) of FTY720 treated animals. Given are the percentages of cells (means ± SD, n=3 control, n=5 FTY720) when gated for CD4 (left panels) or for tet (right panels). **(b)** Summary of data shown as exemplary plots in Fig. 5g. Open bars: control; grey bars: FTY720 treated. Shown are means ± SD (n=3-5), data pooled from 2 independent experiments. An unpaired two-tailed Mann-Whitney test was performed. NS, not significant ( $P > 0.05$ ) and  $*P < 0.05$ .

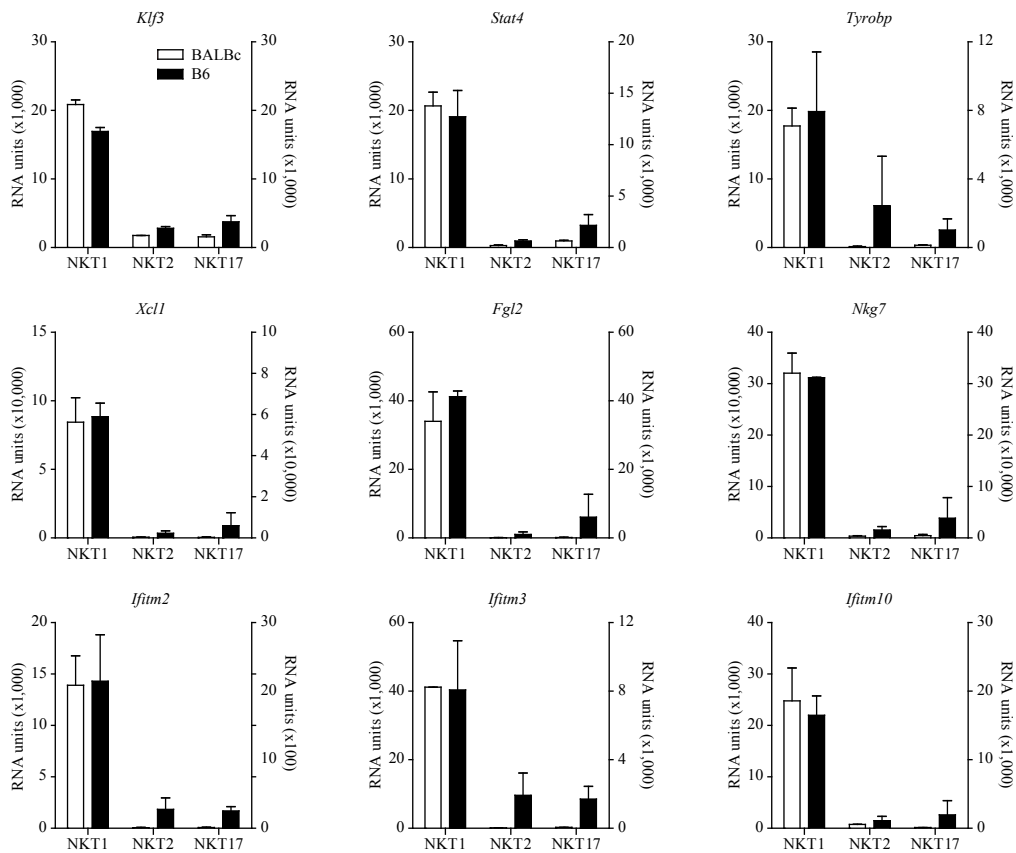

**Supplementary Figure 6. Expression of NK-relevant genes by iNKT cells: a selection.** Shown are results from transcriptome analyses as presented in Fig. 1e,f. Open bars: BALB/c, black bars: B6; shown are means  $\pm$  SD.

**Supplementary Table 1.** BALB/c vs B6: Differently expressed genes by iNKT cell subsets, a selection.

**Note:** A count of 20 units indicates absence of a detectable signal. See also Online Methods. Values of two independent experiments are listed separately for each strain.

| Gene                                                                        | Protein           | BALB/c |        |        | B6      |         |         |
|-----------------------------------------------------------------------------|-------------------|--------|--------|--------|---------|---------|---------|
|                                                                             |                   | iNKT1  | iNKT2  | iNKT17 | iNKT1   | iNKT2   | iNKT17  |
| <b>Expression uniformly higher in B6 than in BALB/c</b>                     |                   |        |        |        |         |         |         |
| <i>Trim12a</i>                                                              | TRIM12A           | 95     | 52     | 20     | 25,589  | 16,642  | 17,165  |
|                                                                             |                   | 54     | 46     | 24     | 24,305  | 16,626  | 13,810  |
| <i>FJ654066</i>                                                             | Endog. retrovirus | 20     | 20     | 20     | 24,787  | 23,809  | 15,437  |
|                                                                             |                   | 20     | 20     | 20     | 16,538  | 18,912  | 11,670  |
| <i>Vps16</i>                                                                | HVPS16            | 230    | 126    | 240    | 9,726   | 7,883   | 7,382   |
|                                                                             |                   | 439    | 252    | 270    | 10,062  | 8,565   | 10,074  |
| <i>Ly6a</i>                                                                 | Ly-6A.2           | 3,920  | 2,776  | 1,784  | 69,118  | 71,927  | 106,158 |
|                                                                             |                   | 4,166  | 1,947  | 1,068  | 73,084  | 72,954  | 120,228 |
| <i>Ly6e</i>                                                                 | Ly-6E             | 20,298 | 30,368 | 33,955 | 245,528 | 213,131 | 219,698 |
|                                                                             |                   | 38,749 | 59,990 | 57,076 | 236,946 | 197,119 | 191,734 |
| <b>Expression uniformly higher in BALB/c than in B6</b>                     |                   |        |        |        |         |         |         |
| <i>Scg5</i>                                                                 | 7B2               | 20,675 | 9,426  | 33,939 | 357     | 57      | 219     |
|                                                                             |                   | 17,556 | 7,373  | 26,414 | 436     | 119     | 308     |
| <i>Ctsl</i>                                                                 | Cat L             | 13,005 | 18,889 | 6,812  | 807     | 627     | 1,479   |
|                                                                             |                   | 21,006 | 16,949 | 5,787  | 1,307   | 1,182   | 2,626   |
| <i>Pianp</i>                                                                | PANP              | 3,531  | 2,403  | 2,735  | 20      | 20      | 20      |
|                                                                             |                   | 4,518  | 3,303  | 3,002  | 20      | 20      | 20      |
| <i>Sfi1</i>                                                                 | SFI1 homolog      | 3,992  | 3,273  | 4,692  | 119     | 125     | 82      |
|                                                                             |                   | 4,463  | 3,172  | 3,397  | 165     | 100     | 111     |
| <b>Biased expression on iNKT subtypes + different between BALB/c and B6</b> |                   |        |        |        |         |         |         |
| <i>Klrblc</i>                                                               | NK1.1             | 2,475  | 416    | 3,985  | 51,418  | 3,507   | 21,097  |
|                                                                             |                   | 2,565  | 248    | 3,081  | 71,400  | 3,017   | 15,069  |
| <i>Klrbl1a</i>                                                              | NKR-P1A           | 1,106  | 1,544  | 1,135  | 20,272  | 2,394   | 9,213   |
|                                                                             |                   | 753    | 1,030  | 789    | 23,529  | 1,880   | 4,920   |
| <i>Klri2</i>                                                                | KLRI2             | 179    | 20     | 20     | 3,602   | 27      | 454     |
|                                                                             |                   | 256    | 20     | 20     | 5,260   | 20      | 62      |
| <i>Ncr1</i>                                                                 | NKp46             | 7,176  | 24     | 22     | 74      | 20      | 20      |
|                                                                             |                   | 5,398  | 20     | 20     | 41      | 20      | 20      |
| <i>Crtam</i>                                                                | CD355             | 1,800  | 3,279  | 23,489 | 270     | 414     | 1,258   |
|                                                                             |                   | 1,643  | 1,672  | 10,102 | 222     | 549     | 1,990   |
| <i>Ccr5</i>                                                                 | CCR-5             | 4,664  | 182    | 102    | 545     | 124     | 214     |
|                                                                             |                   | 2,350  | 43     | 88     | 733     | 163     | 76      |
| <i>Hey1</i>                                                                 | HESR-1            | 195    | 12,154 | 1,058  | 77      | 697     | 318     |
|                                                                             |                   | 170    | 12,287 | 1,20   | 77      | 875     | 461     |
| <i>Cd2</i>                                                                  | CD2               | 64,038 | 9,514  | 1,413  | 65,697  | 31,737  | 28,033  |
|                                                                             |                   | 63,725 | 8,523  | 2,626  | 69,453  | 37,944  | 16,667  |
| <i>Deptor</i>                                                               | DEPDC6            | 20     | 188    | 2,325  | 47      | 74      | 215     |
|                                                                             |                   | 72     | 111    | 2,183  | 35      | 90      | 400     |
| <i>Mtcl1</i>                                                                | SOGA2             | 20     | 89     | 3,764  | 20      | 20      | 326     |
|                                                                             |                   | 63     | 140    | 4,209  | 20      | 20      | 626     |
| <i>Ascl1</i>                                                                | ASH1              | 59     | 164    | 6,450  | 22      | 20      | 76      |
|                                                                             |                   | 77     | 145    | 2,681  | 54      | 42      | 144     |
| <i>Coro2a</i>                                                               | IR10              | 22     | 20     | 20     | 5,629   | 894     | 2,097   |
|                                                                             |                   | 20     | 20     | 20     | 4,745   | 384     | 979     |
| <i>Car2</i>                                                                 | CA-II             | 5,419  | 224    | 209    | 234     | 36      | 40      |
|                                                                             |                   | 4,224  | 240    | 172    | 215     | 68      | 38      |
| <i>Nsg2</i>                                                                 | Protein p19       | 9,812  | 1,553  | 141    | 4,247   | 23,537  | 10,936  |
|                                                                             |                   | 7,416  | 2,052  | 203    | 4,740   | 23,842  | 10,067  |

## Supplementary Table 2. Transcriptome data for selected genes BALB/c.

Note: A count of 20 units indicates absence of a detectable signal. See also Online Methods.

Genes displaying a > 4 fold preferential expression in either subset over both others are colored: iNKT1 = red; iNKT2 = green; iNKT17 = blue.

| Interleukins <sup>1</sup>          |               | Experiment 1 |         |         | Experiment 2 |         |         |
|------------------------------------|---------------|--------------|---------|---------|--------------|---------|---------|
| Gene                               | Protein       | iNKT1        | iNKT2   | iNKT17  | iNKT1        | iNKT2   | iNKT17  |
| <i>Il2</i>                         | IL-2          | 732          | 21      | 20      | 674          | 20      | 20      |
| <i>Il4</i>                         | IL-4          | 1,788        | 39,186  | 11,378  | 2,585        | 58,887  | 9,298   |
| <i>Il13</i>                        | IL-13         | 78           | 4,640   | 179     | 159          | 6,002   | 164     |
| <i>Txlna</i>                       | IL-14         | 3,990        | 4,124   | 4,077   | 3,734        | 4,170   | 4,026   |
| <i>Il16</i>                        | IL-16         | 12,414       | 7,793   | 12,965  | 15,039       | 10,982  | 15,641  |
| <i>Il17a</i>                       | IL-17A        | 20           | 20      | 262     | 20           | 20      | 156     |
| <i>Il21</i>                        | IL-21         | 34           | 1,057   | 146     | 21           | 1,332   | 287     |
| <i>Ifng</i>                        | IFN $\gamma$  | 20,682       | 182     | 482     | 20,096       | 212     | 81      |
| Interleukin receptors <sup>2</sup> |               | Experiment 1 |         |         | Experiment 2 |         |         |
| <i>Il1r1</i>                       | CD121a        | 104          | 726     | 24,244  | 282          | 983     | 21,451  |
| <i>Il2ra</i>                       | CD25          | 869          | 199     | 3,500   | 708          | 155     | 2,368   |
| <i>Il2rb</i>                       | CD122         | 147,275      | 8,923   | 10,117  | 131,762      | 13,208  | 13,050  |
| <i>Il2rg</i>                       | CD132         | 52,328       | 42,354  | 33,649  | 60,804       | 48,841  | 49,848  |
| <i>Il6ra</i>                       | CD126         | 1,671        | 28,638  | 5,052   | 1,309        | 26,746  | 6,327   |
| <i>Il7r</i>                        | CD127         | 105,742      | 66,173  | 139,653 | 86,156       | 49,130  | 109,523 |
| <i>Il10ra</i>                      | CD210         | 7,551        | 29      | 34      | 6,431        | 132     | 99      |
| <i>Il17rb</i>                      | IL-17RB       | 181          | 3,954   | 2,633   | 207          | 4,316   | 3,769   |
| <i>Il17re</i>                      | IL-17RE       | 215          | 684     | 22,507  | 475          | 874     | 25,282  |
| <i>Il23r</i>                       | IL-23R        | 20           | 532     | 17,872  | 275          | 503     | 14,613  |
| <i>Ifngr1</i>                      | CD119         | 92,849       | 9,769   | 66,060  | 95,438       | 9,327   | 41,229  |
| Chemokines <sup>3</sup>            |               | Experiment 1 |         |         | Experiment 2 |         |         |
| <i>Ccl4</i>                        | MIP-1 $\beta$ | 7,063        | 7,732   | 6,314   | 6,947        | 5,669   | 5,419   |
| <i>Ccl5</i>                        | RANTES        | 269,939      | 412     | 278     | 451,315      | 410     | 1,670   |
| <i>Ccl6</i>                        | MRP-1         | 2,997        | 210     | 547     | 1,638        | 20      | 114     |
| <i>Cxcl11</i>                      | ITAC          | 306,158      | 249,622 | 323,140 | 484,549      | 379,004 | 442,138 |
| <i>Xcl1</i>                        | LTN           | 97,081       | 376     | 206     | 71,881       | 637     | 692     |
| Chemokine receptors <sup>4</sup>   |               | Experiment 1 |         |         | Experiment 2 |         |         |
| <i>Ccr2</i>                        | CD192         | 3,677        | 2,237   | 9,726   | 2,557        | 1,765   | 5,674   |
| <i>Ccr4</i>                        | CD194         | 323          | 6,784   | 2,626   | 300          | 4,378   | 1,283   |
| <i>Ccr5</i>                        | CD195         | 4,664        | 182     | 102     | 2,350        | 43      | 88      |
| <i>Ccr6</i>                        | CD196         | 107          | 148     | 7,555   | 886          | 204     | 12,381  |
| <i>Ccr7</i>                        | CD197         | 6,331        | 37,384  | 6,445   | 6,584        | 27,391  | 6,974   |
| <i>Ccr9</i>                        | CDw199        | 4,499        | 7,858   | 861     | 4,362        | 7,370   | 1,268   |
| <i>Ccr10</i>                       | CCR-10        | 3,176        | 26,079  | 19,308  | 1,799        | 12,249  | 14,359  |
| <i>Cxcr3</i>                       | CD183         | 122,829      | 14,613  | 1,840   | 100,084      | 9,981   | 1,577   |
| <i>Cxcr6</i>                       | CD186         | 223,300      | 83,593  | 221,076 | 182,366      | 68,151  | 173,615 |



| <b>Integrins<sup>5</sup></b>                          |                            | Experiment 1 |              |               | Experiment 2 |              |               |
|-------------------------------------------------------|----------------------------|--------------|--------------|---------------|--------------|--------------|---------------|
| <b>Gene</b>                                           | <b>Protein</b>             | <b>iNKT1</b> | <b>iNKT2</b> | <b>iNKT17</b> | <b>iNKT1</b> | <b>iNKT2</b> | <b>iNKT17</b> |
| <i>Itga1</i>                                          | $\alpha$ 1-chain           | 3,258        | 20           | 20            | 2,184        | 20           | 20            |
| <i>Itga4</i>                                          | $\alpha$ 4-chain           | 9,595        | 1,602        | 182           | 7,786        | 1,224        | 365           |
| <i>Itga6</i>                                          | $\alpha$ 6-chain           | 5,236        | 5,316        | 8,316         | 3,129        | 4,248        | 6,205         |
| <i>Itgam</i>                                          | $\alpha$ M-chain<br>/CD11b | 26,329       | 11,557       | 17,761        | 55,562       | 29,627       | 35,007        |
| <i>Itgae</i>                                          | $\alpha$ E-chain<br>/CD103 | 8,507        | 11,077       | 17,450        | 6,219        | 5,655        | 16,021        |
| <i>Itgal</i>                                          | $\alpha$ L-chain<br>/CD11a | 10,003       | 9,029        | 10,343        | 8,096        | 9,790        | 10,951        |
| <i>Itgb1</i>                                          | $\beta$ 1-chain            | 10,804       | 4,043        | 2,067         | 8,885        | 1,955        | 1,244         |
| <i>Itgb2</i>                                          | $\beta$ 2-chain            | 44,437       | 25,123       | 14,970        | 36,915       | 28,617       | 16,859        |
| <i>Itgb3</i>                                          | $\beta$ 3-chain            | 4,286        | 40,676       | 55,610        | 2,265        | 33,549       | 40,542        |
| <i>Itgb7</i>                                          | $\beta$ 7-chain            | 54,399       | 24,875       | 67,558        | 48,804       | 24,439       | 73,464        |
| <b>Toll like receptors<sup>6</sup></b>                |                            | Experiment 1 |              |               | Experiment 2 |              |               |
| <i>Tlr1</i>                                           | CD281                      | 4,349        | 8,271        | 9,518         | 3,807        | 8,963        | 9,542         |
| <i>Tlr6</i>                                           | CD286                      | 811          | 789          | 929           | 579          | 652          | 568           |
| <i>Tlr7</i>                                           | TLR7                       | 3,028        | 4,171        | 2,821         | 7,264        | 4,897        | 5,945         |
| <i>Tlr9</i>                                           | CD289                      | 2,326        | 1,677        | 2,029         | 2,321        | 1,927        | 2,575         |
| <i>Tlr12</i>                                          | TLR12                      | 1,578        | 741          | 234           | 1,357        | 638          | 386           |
| <b>Transcription/<br/>Nuclear factors<sup>2</sup></b> |                            | Experiment 1 |              |               | Experiment 2 |              |               |
| <i>Zbtb16</i>                                         | PLZF                       | 8,340        | 44,013       | 40,517        | 8,765        | 54,910       | 34,890        |
| <i>Tbx21</i>                                          | T-bet                      | 39,615       | 1,282        | 218           | 36,849       | 1,153        | 416           |
| <i>Rorc<sup>γ</sup></i>                               | ROR $\gamma$ , $\gamma$ t  | 88           | 307          | 5,394         | 294          | 438          | 5,860         |
| <i>Gata3</i>                                          | GATA-3                     | 21,778       | 18,009       | 27,855        | 13,917       | 15,949       | 14,211        |
| <i>Zbtb7b</i>                                         | THPOK                      | 12,345       | 15,722       | 15,178        | 18,022       | 20,816       | 19,819        |
| <i>Egr2</i>                                           | EGR2                       | 2,357        | 5,205        | 3,576         | 2,209        | 6,288        | 2,942         |
| <i>Batf</i>                                           | B-ATF                      | 8,661        | 9,657        | 17,049        | 8,810        | 9,362        | 18,099        |
| <i>Vdr</i>                                            | VDR                        | 233          | 2,407        | 6,416         | 149          | 2,846        | 3,224         |
| <i>Klf3</i>                                           | BKLF                       | 20,394       | 1,744        | 1,784         | 21,334       | 1,769        | 1,362         |
| <i>Stat4</i>                                          | STAT4                      | 22,074       | 223          | 1,038         | 19,243       | 362          | 892           |
| <i>Tcf12</i>                                          | HEB                        | 9,385        | 7,319        | 6,684         | 9,508        | 6,615        | 5,907         |
| <i>Id2</i>                                            | BHLHB26                    | 149,554      | 136,951      | 146,254       | 156,747      | 145,636      | 118,625       |
| <i>Id3</i>                                            | BHLHB25                    | 18,584       | 142,240      | 143,248       | 17,212       | 170,789      | 83,048        |
| <i>Lef1</i>                                           | LEF-1                      | 1,658        | 6,589        | 1,533         | 1,561        | 6,459        | 1,560         |
| <b>Cell signaling/<br/>Apoptosis<sup>2</sup></b>      |                            | Experiment 1 |              |               | Experiment 2 |              |               |
| <i>Hcst</i>                                           | DAP10                      | 150,118      | 71,676       | 94,293        | 135,201      | 64,619       | 60,822        |
| <i>Tyrobp</i>                                         | DAP12                      | 19,575       | 194          | 383           | 15,880       | 65           | 300           |
| <i>Mapk10</i>                                         | MAPK10                     | 72           | 936          | 28,793        | 162          | 263          | 8,295         |
| <i>Blk</i>                                            | BLK                        | 222          | 920          | 34,986        | 341          | 792          | 30,431        |
| <i>Dapk2</i>                                          | DAPK2                      | 11,256       | 653          | 110           | 10,693       | 527          | 130           |
| <i>Socs2</i>                                          | SOCS2                      | 5,321        | 166          | 2,846         | 3,912        | 115          | 1,996         |
| <i>Socs3</i>                                          | SOCS3                      | 3,928        | 1,835        | 33,758        | 4,064        | 3,028        | 32,620        |
| <i>Bcl2</i>                                           | BCL2                       | 6,631        | 478          | 508           | 3,923        | 630          | 466           |
| <i>Faslg</i>                                          | CD95L                      | 19,327       | 447          | 131           | 15,990       | 573          | 227           |

- 1) Interleukins including IFN $\gamma$ ; mRNAs giving rise to less than 150 units in all subpopulations are neglected, otherwise all available data for interleukins are displayed.
- 2) Only a selection of expressed genes is displayed.
- 3) Chemokine mRNAs giving rise to less than 1,000 units in all subpopulations are neglected, otherwise all available data for chemokines are displayed.
- 4) Chemokine receptor mRNAs giving rise to less than 1,000 units in all subpopulations are neglected, otherwise all available data for chemokine receptors are displayed.
- 5) Integrin chain mRNAs giving rise to less than 1,500 units in all subpopulations are neglected, otherwise all available data for integrins are displayed.
- 6) TLR mRNAs giving rise to less than 500 units in all subpopulations are neglected, otherwise all available data for TLR are displayed.
- 7) The probe used to detect *Rorc* transcription cannot discriminate whether ROR $\gamma$  or ROR $\gamma$ t will be produced.
